# Supplementary material for: Obstetric Life Support Education for Maternal Cardiac Arrest: A Randomized Clinical Trial
Source: PubMed Central journal article supplement (PMC11568455; doi:10.1001/jamanetworkopen.2024.45295), 2024-11-15
Supplement: jamanetwopen-e2445295-s001.pdf [file jamanetwopen-e2445295-s001.pdf]

1  
2  
3  
4  
5  
6  
7

**Supplemental Files**

Trial Protocol and Statistical Analysis Plan

8  
9  
10  
11  
12  
13  
14  
15  
16  
17  
18  
19  
20  
21  
22  
23  
24  
25  
26  
27

**eMethods**

**Trial Protocol and Statistical Analysis Plan (SAP)**

**Evaluation of Obstetric Life Support (OBLS) Training Program for Responding to Maternal Medical Emergencies**

Principal Investigator: Andrea Shields, MD, MS  
Associate Professor of Obstetrics & Gynecology  
University of Connecticut Health  
Farmington, Connecticut

Protocol identification number: 22X-137

ClinicalTrials.gov identifier: NCT05355519

Author: Charles Minard, PhD  
Statistician  
Baylor College of Medicine  
Houston, Texas

Version Draft 1.0

**SIGNATURE PAGE**

28  
29  
30  
31  
32  
33  
34  
35  
36  
37  
38  
39  
40  
41  
42  
43

Principal Investigator   
Andrea Shields (2024-01-31)

Author   
Charles Minard (2024-01-31)

44  
45  
46  
47  
48  
49  
50  
51  
52  
53  
54  
55  
56  
57  
58  
59  
60  
61  
62  
63  
64  
65  
66

## Table of Contents

|                                                                                            |    |
|--------------------------------------------------------------------------------------------|----|
| 1. Introduction .....                                                                      | 5  |
| 2. Study Objectives and Endpoints .....                                                    | 5  |
| 3. Study Methods                                                                           |    |
| 3.1 General Study Design and Plan.....                                                     | 5  |
| 3.2 Inclusion-Exclusion Criteria and General Study Population. ....                        | 7  |
| 3.3 Randomization and Blinding.....                                                        | 7  |
| 3.4 Study Assessments. ....                                                                | 8  |
| 4. Sample size calculation .....                                                           | 8  |
| 5. General Analysis Considerations                                                         |    |
| 5.1 Timing of Analyses.....                                                                | 8  |
| 5.2 Analysis Populations .....                                                             | 9  |
| 5.2.1 Full Analysis Population (or Intention to Treat or Modified Intention to Treat)..... | 9  |
| 5.2.2 Per Protocol Population.....                                                         | 9  |
| 5.2.3 Safety Population. ....                                                              | 9  |
| 5.3. Covariates and Subgroups. ....                                                        | 9  |
| 5.4 Missing Data. ....                                                                     | 9  |
| 5.5 Multiple Testing. ....                                                                 | 9  |
| 6. Summary of Study Data                                                                   |    |
| 6.1 Subject Disposition.....                                                               | 10 |
| 6.2 Derived variables.....                                                                 | 10 |
| 6.3 Protocol Deviations. ....                                                              | 10 |
| 6.4 Demographic and Baseline Variables. ....                                               | 10 |

|    |                                                             |    |
|----|-------------------------------------------------------------|----|
| 67 | 7. Efficacy Analyses                                        |    |
| 68 | 7.1 Primary Efficacy Analysis.....                          | 11 |
| 69 | 7.2 Secondary Efficacy Analyses.....                        | 11 |
| 70 | 7.2.1 Secondary Analyses of Primary Efficacy Endpoint ..... | 11 |
| 71 | 7.2.2 Analyses of Secondary Endpoints.....                  | 11 |
| 72 | 8. Safety Analyses .....                                    | 12 |
| 73 | 9. Abbreviations.....                                       | 12 |

74 1 Introduction

75

76

77 **1.1 Preface**

78

79 Obstetric Life Support (OBS) is a comprehensive training program designed to equip  
80 healthcare professionals with the necessary skills and knowledge to manage maternal medical  
81 emergencies and maternal cardiac arrest scenarios. This statistical analysis plan (SAP) will give  
82 more detailed descriptions of the endpoints in the study and the corresponding analyses.

83

84 **1.2 Scope of the analyses**

85

86 The study design is a prospective, single-blinded, randomized controlled trial with delayed  
87 intervention for the control group to evaluate the Obstetric Life Support (OBS) education. The  
88 participants will be providers, nurses and GME learners currently certified in advanced cardiac  
89 life support (ACLS) or basic life support (BLS) and recruited from the anesthesiology, OB/GYN,  
90 emergency medicine, and critical care departments. Participants will be randomly allocated to  
91 receive OBS education (Intervention arm) or no OBS education (Control arm).

92

93 2 Study Objectives and Endpoints

94

95 **2.1 Study Objectives**

96

97 The objectives of this study are to develop and test the effectiveness of an educational  
98 program for improving knowledge and skills in managing maternal medical emergencies  
99 and maternal cardiac arrest among healthcare professionals.

100

101 **2.2 Endpoints**

102 2.2.1 Primary outcome measures

- 103 1. Cognitive test score

104

105 2.2.2. Secondary outcome measures

- 106 1. Confidence scores

- 107 2. Megacode scores

- 108 3. Combined assessment pass rate

109

110 3 Study Methods

111

112

113 **3.1 General Study Design and Plan**

114

115 This study will be a single-blind, randomized controlled trial with delayed intervention for  
116 controls. Participants will be randomized in a 1:1 ratio to Intervention (OBS education) or

117 Control arm (delayed OBLs education). Participants will be randomized after enrollment.  
118 Evaluators will be blinded to the assigned study arm.

119  
120 Participants assigned to the Intervention arm will receive cognitive didactic and interactive  
121 sessions and deliberate practice on a customized simulator. Cognitive and confidence evaluations  
122 are assessed at enrollment (Time 0), post-intervention (Time 1), 6-months post-enrollment (Time  
123 2), and 12-months post-enrollment (Time 3). Megacode evaluations (technical and behavioral)  
124 will also be completed during Time 1.

125  
126 Participants assigned to the Control arm will receive cognitive and confidence evaluations at  
127 enrollment (Time 1) but will not receive the educational intervention until 6-months post-  
128 enrollment (Time 2). Cognitive and confidence evaluations are then assessed post-intervention  
129 at the 6-month time point (Time 2) and 12-months post-enrollment (Time 3). Megacode  
130 evaluations are also completed during Time 1.

131  
132 The primary outcome of interest is cognitive scores during Time 1. The superiority of the OBLs  
133 education will be assessed in the Intervention arm versus the Control arm during Time 1.  
134 Secondary outcomes include cognitive scores at other time points as well as confidence scores  
135 and Megacode scores.

136  
137 The overall study design is summarized in Figure. At enrollment (Time 0), participants in the  
138 intervention arm will receive cognitive and self-efficacy assessments followed by receipt of the  
139 OBLs manual and prework 30-days prior to Time 1. The control arm will not receive any  
140 supplemental materials or instruction.

141  
142 At Time 1, the intervention arm will receive OBLs in-person education with cognitive, self-  
143 efficacy, and Megacode assessment post-education. The control arm will receive baseline  
144 cognitive, self-efficacy assessments and Megacode assessment followed by receipt of the OBLs  
145 manual for prework 30-days prior to Time 2.

146  
147 At Time 2 (6-months post-randomization), the intervention arm will be assessed for 6-month  
148 retention of cognitive and self-efficacy scores. The control arm will receive OBLs in-person  
149 education with cognitive, self-efficacy, and Megacode assessment post-education.

150  
151 In Time 3 (12-months post-randomization), both study arms receive cognitive and self-efficacy  
152 assessments. This represents the 12-month knowledge retention for the intervention arm and 6-  
153 months for the control arm.

154  
155  
156  
157

Figure. Flowchart of screening and inclusion process.

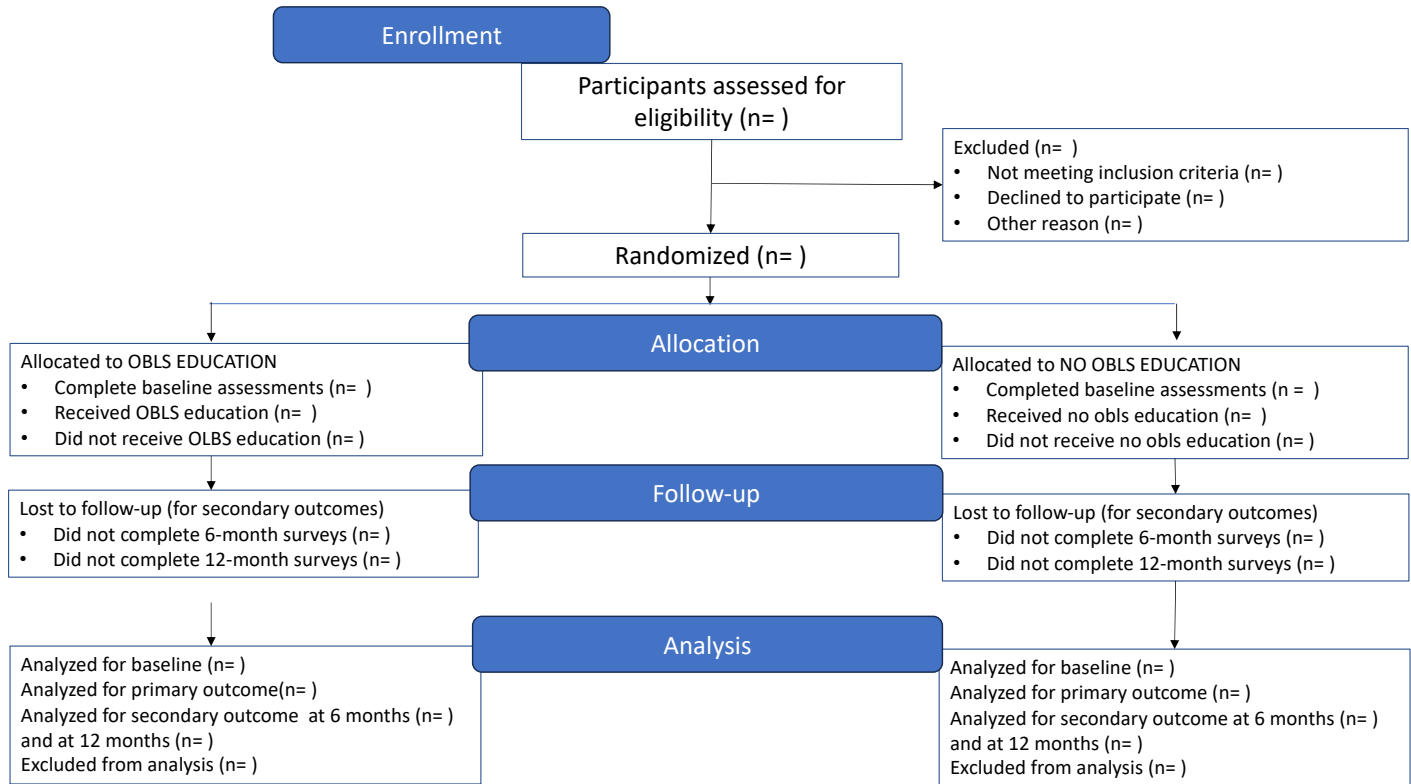

158

159

160

### 3.2 Inclusion-Exclusion Criteria and General Study Population

161

162

163

164

165

166

167

168

169

170

171

172

173

174

Study subjects will be English-speaking healthcare workers (18 years of age or greater) who work out-of-hospital (OH) or in-hospital (IH) contexts and care for reproductive-age women. For OH OBLS education, teams will have a maximum of four participants each consisting of two pairs of EMS healthcare professionals of varying levels, including law enforcement and firefighters. One participant must have at least five years or more in their current role. For IH OBLS education, teams will have a maximum of six participants consisting of at least one emergency medicine healthcare professional from Emergency Department (ED), Family Practice (FP), Intensive Care Unit (ICU), Surgery (Obstetrics [OB]); one anesthesiologist; one trainee of graduate medical education (GME) and/ one nurse from ED, FP, ICU/NICU, or OB/Labor & Delivery (L&D). Apart from the GME learners, at least one healthcare professional and one nurse must have at least five years of experience within their specialty. Exclusion criteria include anyone who meets eligibility criteria but who participated in our pilot validation trials and who do not consent to be randomized.

175

176

### 3.3 Randomization and Blinding

177

178

The study is a single-blinded RCT with two study arms. Subjects will be randomized to the



179 intervention or control in a 1:1 ratio using a permuted block design with random block sizes.  
180 Randomization will be stratified by hospital status (i.e., out-of-hospital versus in-hospital).

### 3.4 Study Assessments

Study assessments include the following validated instruments:

1. Cognitive test

Developed and validated for participants from in- and out-of-hospital for online administration. Participants designated as out-of-hospital are further assigned to a basic versus advanced cognitive test based on their roles (e.g., EMTs that cannot administer medications or use advanced airways will be given the out-of-hospital, basic assessment). Each test item is equally weighted, and a final score is tabulated by computing the percent of items correct. Items with missing responses are assumed to be incorrect.

2. Megacode checklist

Developed and validated for assessment of the team leader during a Megacode scenario of a maternal medical emergency by blinded evaluators. Participants from out-of-hospital contexts are further assigned to a basic versus advanced Megacode checklist test based on their roles (e.g., EMTs that cannot administer medications or use advanced airways will be given the out-of-hospital -basic Megacode checklist assessment). Each test item is on a Likert scale, and a final score is tabulated by adding up scores for each item and converting to a 100-point scale.

3. Self-efficacy assessment

Developed and validated online assessment of confidence in four categories: clinical confidence, procedural confidence, knowledge confidence, and communication confidence. Each item is equally weighted, and a final score is tabulated by adding up all items and converting to a 100-point scale.

## 4 Sample Size Calculation

The primary outcome of interest is cognitive test scores during Time 1, and the primary hypothesis test will compare mean cognitive test scores during Time 1 between study arms using an independent, two-sample t-test. Preliminary data estimated the standard deviation of cognitive test scores to be about 12 points (Shields et al., 2023). A difference between means of 10-points is assumed to be clinically important. A sample size of 24 participants per group (N=48 total) provides 80% power to reject the null hypothesis that mean cognitive test scores are equal between study arms using an independent, two-sample t-tests assuming a common SD=12 and two-sided alpha = 0.05.

## 5 General Analysis Considerations

### 5.1 Timing of Analyses

Data will be analyzed after the trial is complete and will be defined as 3-months after Time 3 (12-months post-randomization).

225 **5.2 Analysis Populations**

226 5.2.1 Full Analysis Population (or Intention to Treat or Modified Intention to Treat)

227 Intention-to-treat (ITT)

228 All eligible, randomized participants. This will be the primary population for the analysis.  
229 Primary and secondary efficacy end points will be analyzed using intention-to-treat, with  
230 analyses including all eligible, randomized participants.

231

232 5.2.2 Per Protocol Population

233

234 All eligible, randomized participants who completed assessments at all time points. For a  
235 specific analysis, study subjects with missing data on any of the variables in the model  
236 will be excluded from the analysis. Analyses of this population is seen as a sensitivity  
237 analysis to investigate whether conclusions are sensitive to assumptions regarding the  
238 pattern of missing data.

239

240 5.2.3 Safety Population

241

242 We do not anticipate the need for safety population analysis due to low-risk intervention.

243

244 **5.3. Covariates and Subgroups**

245 We plan to analyze Megacode assessment outcomes based on the following subgroups: hospital-  
246 based versus out-of-hospital.

247

248 **5.4 Missing Data**

249

250 Cognitive test items that are missing will be scored as incorrect responses. Otherwise, scores for  
251 missing assessments (cognitive, self-efficacy, and megacode) will not be imputed. All available  
252 scores will be included in the primary analysis of the full population.

253

254 **5.5 Multiple Testing**

255

256 The primary outcome of interest is cognitive test scores. The primary hypothesis test will  
257 compare mean cognitive scores between treatment arms using an independent, two-sample t-test  
258 assuming homogenous variance and will be assessed at the two-sided 0.05 level. Secondary  
259 analysis will compare mean cognitive scores between arms across all time points using a general  
260 linear mixed model. If the arm-time interaction term is significant at the 0.05 level, then all  
261 pairwise comparisons will be assessed, and p-values will be adjusted for multiple comparisons  
262 using Tukey's method.

263

264 Secondary outcomes include self-efficacy, megacode scores, and combined assessment pass rate  
265 (this includes meeting expert-derived minimum score for cognitive and megacode assessments).  
266 Self-efficacy scores will be analyzed like the primary outcome. Megacode are observed at a  
267 single time point and will be assessed at the two-sided 0.05 level. Combined assessment pass  
268 rate will compare the percent of participants who pass using Fisher's exact test assessed at the  
269 two-sided 0.05 level.

## 6 Summary of Study Data

### 6.1 Subject Disposition

The number and proportion of screened, randomized, treated, and analyzed subjects will be provided. Where necessary, the CONSORT flow chart will be presented to describe the subject disposition in the statistical analysis report.

### 6.2 Derived variables

Cognitive scores will be computed as the percent of items correct and scores will range from 0% to 100%. Self-efficacy scores will be computed as the sum of item responses and converted to a 100-point scale. Scores will range from 0 to 100 points. Megacode scores will be computed as the percent of items correct and score will range from 0% to 100%. Participant age at enrollment will be computed as the integer age (rounded down) at the time of enrollment.

### 6.3 Protocol Deviations

For our trial, a protocol deviation is defined as a failure to adhere to the protocol such as the wrong intervention being administered, incorrect data being collected and documented, errors in applying inclusion/exclusion criteria or missed follow-up visits. Major deviations will include errors in randomization to OBLS versus no education, incorrect data being collected and documented, and errors in applying inclusion/exclusion criteria. Minor deviations include missed follow-up assessments. We will summarize protocol deviations in the analysis (e.g., number and type of protocol deviations by intervention group or listing of all deviations) and provide details of whether the deviation is major or minor. If deviations occur, a sensitivity analyses will be conducted by removing patients with major deviations to assess impact on overall conclusions.

### 6.4 Demographic and Baseline Variables

Demographic/baseline variables will include age (years), gender identify (woman, man, non-binary), race/ethnicity (Asian/Black or African American, White, Hispanic/Latinx, Prefer not to answer), how many times participants have participated in a simulation exercise (< 5, 5-10, >10 and <20, and >20), if they have experience as a simulation instructor (yes/no), , if they are certified in BLS (currently certified, never certified or previously certified), if they are certified in ACLS (currently certified, never certified or previously certified), if they are certified in ATLS (currently certified, never certified or previously certified), if they are certified in PHTL (currently certified, never certified or previously certified), if they are certified in NRP (currently certified, never certified or previously certified), if they are certified as an BLS instructor (currently certified, never certified or previously certified), or if they are certified as an ACLS instructor (currently certified, never certified or previously certified). For normally distributed data comparing two means We will perform an independent, two sample test.

Baseline demographics and professional characteristics will be summarized by means with standard deviations, medians with minimum and maximum values, or frequencies with percentages. Summary statistics will be stratified by treatment arm and compared using

316 independent, two-sample t-tests, Wilcoxon rank sum test, chi-square test, or Fisher exact test as  
 317 appropriate. Approximate normality will be assessed by quantile-quantile plots and Shapiro-Wilk  
 318 test. Homogeneity of variances will be assessed by Levene’s test. Table 1 presents an example  
 319 table for summarizing and comparing baseline characteristics.  
 320

321 Table 1. Baseline participant characteristics

| Characteristic               | All<br>(n=) | Intervention<br>(n=) | Control<br>(n=) | P-value |
|------------------------------|-------------|----------------------|-----------------|---------|
| Age at enrollment in years   |             |                      |                 |         |
| N                            | N           | N                    | N               |         |
| Mean (sd)                    | Mean (sd)   | Mean (sd)            | Mean (sd)       | P       |
|                              |             |                      |                 |         |
| Gender, n (%)                |             |                      |                 |         |
| Woman                        | N (%)       | N (%)                | N (%)           | P       |
| Man                          | N (%)       | N (%)                | N (%)           |         |
| Non-binary                   | N (%)       | N (%)                | N (%)           |         |
|                              |             |                      |                 |         |
| Race and Ethnicity, n (%)    |             |                      |                 |         |
| Asian                        | N (%)       | N (%)                | N (%)           | P       |
| Black or African American    | N (%)       | N (%)                | N (%)           |         |
| White                        | N (%)       | N (%)                | N (%)           |         |
| Hispanic or Latino           | N (%)       | N (%)                | N (%)           |         |
| Other (Prefer not to answer) | N (%)       | N (%)                | N (%)           |         |
|                              |             |                      |                 |         |
| ...                          | ...         | ...                  | ...             | ...     |

322  
 323 **7 Efficacy Analyses**

324 **7.1 Primary Efficacy Analysis**

325  
 326 The primary analysis will compare mean cognitive scores between treatment arms during Time  
 327 1 using an independent, two-sample t-test assuming equal variances as assessed at the two-sided  
 328 alpha=0.05 level. Secondary analysis will use a general linear mixed model to compare mean  
 329 cognitive scores between treatment arms across all time points. The model will include fixed  
 330 effects for arm, time (i.e., Time 0, 1, 2, 3), and the arm-time interaction term. If the interaction  
 331 term is significant at the 0.05 level, then all pairwise comparisons will be assessed by the model  
 332 using linear contrasts and p-values will be adjusted for multiple comparisons using Tukey’s  
 333 method. Statistical significance will be assessed at the two-sided 0.05 level. The model will also  
 334 estimate means with 95% confidence intervals by arm and time point. The matrix of correlated  
 335 residuals will assume an unstructured format.  
 336

337 **7.2 Secondary Efficacy Analyses**

338  
 339 Secondary outcomes include self-efficacy scores, megacode scores, and combined assessment  
 340 pass rate. Self- efficacy will be analyzed using a general linear mixed model similar to the  
 341 secondary analysis of the primary outcome. Megacode scores will compare mean scores between  
 342 treatment arms using

343 an independent, two-sample t-test. Combined assessment pass rates will estimate the frequency  
344 with percent of group passing the exam. Fisher exact test will compare percent passing between  
345 the two treatment arms. Statistical significance will be assessed at the 0.05 for all secondary  
346 outcomes.

347 **8 Safety Analyses**

348 Adverse events occurring during the OBLS education.

349 **9 Abbreviations**

350

351 ACLS Advanced Cardiac Life Support

352 ATLS Advanced Trauma Life Support

353 BLS Basic Life Support

354 CI Confidence Interval

355 IQR Interquartile Range

356 ITT Intention-to-Treat

357 NRP Neonatal Resuscitation Program

358 OBLS Obstetric Life Support

359 PHTLS Prehospital Trauma Life Support

360 PP Per Protocol

361 RCT Randomized Clinical Trial

362 SAP Statistical Analysis Plan

363

364

365

366 **References**

367

368 Shields, A. D., Vidosh, J., Thomson, B. A., Minard, C., Annis-Brayne, K., Kavanagh, L., Roth,  
369 C. K., Lutgendorf, M. A., Rahm, S. J., Becker, L. R., Mosesso, V. N., Schaeffer, B., Gresens, A.,  
370 Epley, S., Wagner, R., Streitz, M. J., Bhalala, U. S., Melvin, L. M., Deering, S., & Nielsen, P. E.  
371 (2023). Validation of a Simulation-Based Resuscitation Curriculum for Maternal Cardiac Arrest
