# Supplementary material for: Obstetric Life Support Education for Maternal Cardiac Arrest: A Randomized Clinical Trial
Source: PubMed Central journal article supplement (PMC11568455; doi:10.1001/jamanetworkopen.2024.45295), 2024-11-15
Supplement: jamanetwopen-e2445295-s002.pdf [file jamanetwopen-e2445295-s002.pdf]

## Supplementary Online Content

Shields AD, Vidosh J, Minard C, et al. Obstetric Life Support education for maternal cardiac arrest: a randomized clinical trial. *JAMA Netw Open*. 2024;7(11):e2445295. doi:10.1001/jamanetworkopen.2024.45295

**eFigure 1.** Prehospital Advanced Megacode Checklist

**eFigure 2.** Prehospital Basic Megacode Checklist

**eFigure 3.** In-Hospital Megacode Checklist

**eFigure 4.** Orientation Checklist for In-Person Training

This supplementary material has been provided by the authors to give readers additional information about their work.

eFigure 1. Prehospital Advanced Megacode checklist.

**OBLS MEGACODE CHECKLIST - Out-of-Hospital Advanced**

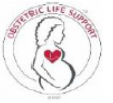

Name of Team Leader \_\_\_\_\_

Scenario \_\_\_\_\_

Directions: For each participant, use the scale provided and circle the number indicating the extent to which they completed the action. Items with \* are critical components. Participants must have no (0) critical fails in order to pass.

| Step                                          | Assessment/Action                                                                                                               | Done Correctly = 5<br>Done Poorly or Delayed = 3<br>Not Done = 0<br>N/A |   |   |     |                |
|-----------------------------------------------|---------------------------------------------------------------------------------------------------------------------------------|-------------------------------------------------------------------------|---|---|-----|----------------|
| <b>RESUSCITATION</b>                          |                                                                                                                                 |                                                                         |   |   |     |                |
| 1                                             | Performs primary survey                                                                                                         | 5                                                                       | 3 | 0 | N/A | 1 min          |
| 2                                             | Recognizes cardiac arrest*                                                                                                      | 5                                                                       | 3 | 0 | N/A |                |
| 3                                             | Calls for additional resources as needed                                                                                        | 5                                                                       | 3 | 0 | N/A |                |
| 4                                             | Places patient on hard surface/safe location                                                                                    | 5                                                                       | 3 | 0 | N/A |                |
| 5                                             | Initiates high-quality chest compressions*                                                                                      | 5                                                                       | 3 | 0 | N/A |                |
| 6                                             | Establishes and maintains effective ventilation (as staffing allows)*                                                           | 5                                                                       | 3 | 0 | N/A |                |
| 7                                             | Ventilates at an appropriate rate                                                                                               | 5                                                                       | 3 | 0 | N/A |                |
| 8                                             | Assesses possibility of pregnancy/assesses uterine fundus relationship to umbilicus                                             | 5                                                                       | 3 | 0 | N/A |                |
| 9                                             | Performs left uterine displacement*                                                                                             | 5                                                                       | 3 | 0 | N/A | 2-5 mins       |
| 10                                            | Anticipates potential need for resuscitative cesarean delivery                                                                  | 5                                                                       | 3 | 0 | N/A |                |
| 11                                            | Places defibrillation pads avoiding breast tissue                                                                               | 5                                                                       | 3 | 0 | N/A |                |
| 12                                            | Assesses cardiac rhythm immediately after pads placed                                                                           | 5                                                                       | 3 | 0 | N/A |                |
| 13                                            | Defibrillates if indicated, clears patient prior to shock*                                                                      | 5                                                                       | 3 | 0 | N/A |                |
| 14                                            | Inserts IV or IO above diaphragm                                                                                                | 5                                                                       | 3 | 0 | N/A |                |
| 15                                            | Administers epinephrine                                                                                                         |                                                                         |   |   |     |                |
|                                               | a. non-shockable: immediately                                                                                                   | 5                                                                       | 3 | 0 | N/A |                |
|                                               | b. shockable: after two shocks                                                                                                  | 5                                                                       | 3 | 0 | N/A |                |
| 16                                            | Recognizes and treats reversible etiologies for maternal cardiac arrest, if applicable (e.g., Narcan for opioid overdose, etc.) | 5                                                                       | 3 | 0 | N/A |                |
| 17                                            | Directs preparation for and transport of patient to most appropriate facility (OB Arrest Alert)*                                | 5                                                                       | 3 | 0 | N/A |                |
| 18                                            | Applies ACCD correctly, if used                                                                                                 | 5                                                                       | 3 | 0 | N/A |                |
| <b>A. Resuscitation SUBTOTAL (Items 1-18)</b> |                                                                                                                                 |                                                                         |   |   |     |                |
| <b>POST-ROSC CARE</b>                         |                                                                                                                                 |                                                                         |   |   |     |                |
| 19                                            | Verifies return of spontaneous circulation (ROSC)                                                                               | 5                                                                       | 3 | 0 | N/A | POST-ROSC CARE |
| 20                                            | Evaluates AVPU                                                                                                                  | 5                                                                       | 3 | 0 | N/A |                |
| 21                                            | Maintains airway and gives breaths every 6 seconds, as needed                                                                   | 5                                                                       | 3 | 0 | N/A |                |
| 22                                            | Maintains left uterine displacement                                                                                             | 5                                                                       | 3 | 0 | N/A |                |
| 23                                            | Obtains and transmits 12-lead ECG                                                                                               | 5                                                                       | 3 | 0 | N/A |                |
| 24                                            | Maintains vascular access and administers fluids                                                                                | 5                                                                       | 3 | 0 | N/A |                |
| 25                                            | Evaluates for causes                                                                                                            | 5                                                                       | 3 | 0 | N/A |                |
| <b>B. Post-ROSC SUBTOTAL (Items 19-25)</b>    |                                                                                                                                 |                                                                         |   |   |     |                |

| Step                    | Assessment/Action                                                                              | Done Correctly = 5<br>Done Poorly or Delayed = 3<br>Not Done = 0<br>N/A |   |   |     |
|-------------------------|------------------------------------------------------------------------------------------------|-------------------------------------------------------------------------|---|---|-----|
| <b>TEAM PERFORMANCE</b> |                                                                                                |                                                                         |   |   |     |
| 26                      | Performs continuous LUD throughout resuscitation                                               | 5                                                                       | 3 | 0 | N/A |
| 27                      | Rotates personnel performing chest compressions and LUD every 2 min                            | 5                                                                       | 3 | 0 | N/A |
| 28                      | Minimizes chest compression interruptions (< 10 sec delay)                                     | 5                                                                       | 3 | 0 | N/A |
| 29                      | Designated team member guides resuscitation with OBLS cognitive aid (ALIVE at 5)               | 5                                                                       | 3 | 0 | N/A |
| 30                      | Keeps time of cardiac arrest and log of times/interventions                                    | 5                                                                       | 3 | 0 | N/A |
| 31                      | Performs continuous high-quality CPR/OBLS until ROSC or higher level of care transfer achieved | 5                                                                       | 3 | 0 | N/A |
| 32                      | Uses BAACC TO LIFE for differential diagnosis                                                  | 5                                                                       | 3 | 0 | N/A |

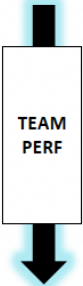

**C. Team Performance SUBTOTAL (Items 26-32)**

**COMMUNICATION/TEAMWORK**

| Step        | How well <u>did the TEAM</u>                       | Perfect = 5      Good = 4<br>Average = 3      Poor = 2<br>Unacceptable = 1 |   |   |   |   |
|-------------|----------------------------------------------------|----------------------------------------------------------------------------|---|---|---|---|
| 33          | Use SBAR to orient team members as they arrived?   | 5                                                                          | 4 | 3 | 2 | 1 |
| 34          | Call for ADDITIONAL ASSISTANCE in a timely manner? | 5                                                                          | 4 | 3 | 2 | 1 |
| 35          | Utilize CLOSED-LOOP communication?                 | 5                                                                          | 4 | 3 | 2 | 1 |
| 36          | Maintain SITUATIONAL AWARENESS?                    | 5                                                                          | 4 | 3 | 2 | 1 |
| 37          | Utilize PATIENT FRIENDLY language and tone         | 5                                                                          | 4 | 3 | 2 | 1 |
| <b>Step</b> | <b>Rate</b>                                        |                                                                            |   |   |   |   |
| 38          | OVERALL team communication                         | 5                                                                          | 4 | 3 | 2 | 1 |
| 39          | OVERALL team performance                           | 5                                                                          | 4 | 3 | 2 | 1 |

**D. Communication/Teamwork SUBTOTAL (Items 33-39)**

| <b>SCORING</b>   |                                                 |            |
|------------------|-------------------------------------------------|------------|
| <b>Subtotals</b> |                                                 |            |
| A                | Resuscitation                                   |            |
| B                | Post-ROSC                                       |            |
| C                | Team Performance                                |            |
| D                | Total Communication/Teamwork                    |            |
| E                | Subtotal (add A + B + C + D)                    |            |
| F                | <b>Total points possible</b>                    | <b>200</b> |
| G                | N/A adjustment (multiply # of N/A by 5)         |            |
| H                | Adjusted total points (F minus G)               |            |
| I                | Overall weighted score (divide E by H)          |            |
| J                | Number of critical components* scored 0 (#1-21) |            |

**SUMMARY**

PASS = Overall score > 74% and no critical components scored 0.  
Circle YES or NO.

|     |    |
|-----|----|
| YES | NO |
|-----|----|

Instructor Signature: \_\_\_\_\_

Instructor Name and Date: \_\_\_\_\_

Instructor potential?      YES      NO

eFigure 2. Prehospital Basic Megacode checklist.

**OBLS MEGACODE CHECKLIST - Out-of-Hospital BASIC**

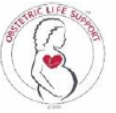

Name of Team Leader \_\_\_\_\_ Scenario \_\_\_\_\_

Directions: For each participant, use the scale provided and circle the number indicating the extent to which they completed the action. Items with \* are critical components. Participants must have no (0) critical fails in order to pass.

| Step                                          | Assessment/Action                                                                                | Done Correctly = 5<br>Done Poorly or Delayed = 3<br>Not Done = 0<br>N/A |   |   |     |                |
|-----------------------------------------------|--------------------------------------------------------------------------------------------------|-------------------------------------------------------------------------|---|---|-----|----------------|
| <b>RESUSCITATION</b>                          |                                                                                                  |                                                                         |   |   |     |                |
| 1                                             | Performs primary survey                                                                          | 5                                                                       | 3 | 0 | N/A | 1 min          |
| 2                                             | Recognizes cardiac arrest*                                                                       | 5                                                                       | 3 | 0 | N/A |                |
| 3                                             | Calls for additional resources as needed                                                         | 5                                                                       | 3 | 0 | N/A |                |
| 4                                             | Places patient on hard surface/safe location                                                     | 5                                                                       | 3 | 0 | N/A |                |
| 5                                             | Initiates high-quality chest compressions*                                                       | 5                                                                       | 3 | 0 | N/A |                |
| 6                                             | Establishes and maintains effective ventilation (as staffing allows)*                            | 5                                                                       | 3 | 0 | N/A |                |
| 7                                             | Ventilates at an appropriate rate and depth                                                      | 5                                                                       | 3 | 0 | N/A |                |
| 8                                             | Assesses possibility of pregnancy/assesses uterine fundus relationship to umbilicus              | 5                                                                       | 3 | 0 | N/A |                |
| 9                                             | Performs LUD*                                                                                    | 5                                                                       | 3 | 0 | N/A | 2-5 mins       |
| 10                                            | Anticipates potential need for RCD                                                               | 5                                                                       | 3 | 0 | N/A |                |
| 11                                            | Places defibrillation pads avoiding breast tissue                                                | 5                                                                       | 3 | 0 | N/A |                |
| 12                                            | Assesses cardiac rhythm with AED immediately after pads placed                                   | 5                                                                       | 3 | 0 | N/A |                |
| 13                                            | Defibrillates if indicated by AED, clears patient prior to shock*                                | 5                                                                       | 3 | 0 | N/A |                |
| 14                                            | Directs preparation for and transport of patient to most appropriate facility (OB Arrest Alert)* | 5                                                                       | 3 | 0 | N/A |                |
| 15                                            | Applies ACCD correctly, if used                                                                  | 5                                                                       | 3 | 0 | N/A |                |
| <b>A. Resuscitation SUBTOTAL (Items 1-15)</b> |                                                                                                  |                                                                         |   |   |     |                |
| <b>POST-ROSC CARE</b>                         |                                                                                                  |                                                                         |   |   |     |                |
| 16                                            | Verifies ROSC                                                                                    | 5                                                                       | 3 | 0 | N/A | POST-ROSC CARE |
| 17                                            | Evaluates AVPU scale (alert, verbal, pain, unresponsive)                                         | 5                                                                       | 3 | 0 | N/A |                |
| 18                                            | Maintains airway and gives breaths every 6 seconds, as needed                                    | 5                                                                       | 3 | 0 | N/A |                |
| 19                                            | Maintains LUD                                                                                    | 5                                                                       | 3 | 0 | N/A |                |
| 20                                            | Obtains and transmits 12-lead ECG                                                                | 5                                                                       | 3 | 0 | N/A |                |
| 21                                            | Maintains vascular access and administers fluids                                                 | 5                                                                       | 3 | 0 | N/A |                |
| 22                                            | Evaluates for causes                                                                             | 5                                                                       | 3 | 0 | N/A |                |
| <b>B. Post-ROSC SUBTOTAL (Items 16-22)</b>    |                                                                                                  |                                                                         |   |   |     |                |

| Step                                                    | Assessment/Action                                                                | Done Correctly = 5<br>Done Poorly or Delayed = 3<br>Not Done = 0<br>N/A |   |   |                  |   |
|---------------------------------------------------------|----------------------------------------------------------------------------------|-------------------------------------------------------------------------|---|---|------------------|---|
| <b>TEAM PERFORMANCE</b>                                 |                                                                                  |                                                                         |   |   |                  |   |
| 23                                                      | Performs continuous LUD throughout resuscitation                                 | 5                                                                       | 3 | 0 | N/A              |   |
| 24                                                      | Rotates personnel performing chest compressions and LUD every 2 min              | 5                                                                       | 3 | 0 | N/A              |   |
| 25                                                      | Minimizes chest compression interruptions (< 10 sec delay)                       | 5                                                                       | 3 | 0 | N/A              |   |
| 26                                                      | Designated team member guides resuscitation with OBLS cognitive aid (ALIVE at 5) | 5                                                                       | 3 | 0 | N/A              |   |
| <b>C. Team Performance SUBTOTAL (Items 23-26)</b>       |                                                                                  |                                                                         |   |   | <b>TEAM PERF</b> |   |
| <b>COMMUNICATION/TEAMWORK</b>                           |                                                                                  |                                                                         |   |   |                  |   |
| Step                                                    | How well <u>did the TEAM</u>                                                     | Perfect = 5    Good = 4<br>Average = 3    Poor = 2<br>Unacceptable = 1  |   |   |                  |   |
| 27                                                      | Use SBAR to orient team members as they arrived?                                 | 5                                                                       | 4 | 3 | 2                | 1 |
| 28                                                      | Call for ADDITIONAL ASSISTANCE in a timely manner?                               | 5                                                                       | 4 | 3 | 2                | 1 |
| 29                                                      | Utilize CLOSED-LOOP communication?                                               | 5                                                                       | 4 | 3 | 2                | 1 |
| 30                                                      | Maintain SITUATIONAL AWARENESS?                                                  | 5                                                                       | 4 | 3 | 2                | 1 |
| 31                                                      | Utilize PATIENT FRIENDLY language and tone                                       | 5                                                                       | 4 | 3 | 2                | 1 |
| Step                                                    | Rate                                                                             |                                                                         |   |   |                  |   |
| 32                                                      | OVERALL team communication                                                       | 5                                                                       | 4 | 3 | 2                | 1 |
| 33                                                      | OVERALL team performance                                                         | 5                                                                       | 4 | 3 | 2                | 1 |
| <b>D. Communication/Teamwork SUBTOTAL (Items 27-33)</b> |                                                                                  |                                                                         |   |   |                  |   |

| SCORING |                                                 |            |
|---------|-------------------------------------------------|------------|
|         |                                                 | Subtotals  |
| A       | Resuscitation                                   |            |
| B       | Post-ROSC                                       |            |
| C       | Team Performance                                |            |
| D       | Total Communication/Teamwork                    |            |
| E       | Subtotal (add A + B + C + D)                    |            |
| F       | <b>Total points possible</b>                    | <b>165</b> |
| G       | N/A adjustment (multiply # of N/A by 5)         |            |
| H       | Adjusted total points (F minus G)               |            |
| I       | Overall weighted score (divide E by H)          |            |
| J       | Number of critical components* scored 0 (#1-22) |            |

**SUMMARY**

PASS = Overall score > 74% and no critical components scored 0.  
Circle YES or NO.

|     |    |
|-----|----|
| YES | NO |
|-----|----|

Instructor Signature: \_\_\_\_\_

Instructor Name and Date: \_\_\_\_\_

Instructor potential?    YES    NO

eFigure 3. In-hospital Megacode checklist.

### OBLS MEGACODE CHECKLIST - In-Hospital

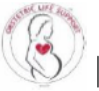

Name of Team Leader \_\_\_\_\_ Scenario \_\_\_\_\_

**Directions:** For each participant, use the scale provided and circle the number indicating the extent to which they completed the action. Items with \* are critical components. *Participants must have no (0) critical fails in order to pass.*

| Step                                            | Assessment/Action                                                                                                                               | Done Correctly = 5<br>Done Poorly or Delayed = 3<br>Not Done = 0<br>N/A |        |        |            |                |
|-------------------------------------------------|-------------------------------------------------------------------------------------------------------------------------------------------------|-------------------------------------------------------------------------|--------|--------|------------|----------------|
|                                                 |                                                                                                                                                 | 5                                                                       | 3      | 0      | N/A        |                |
| <b>RESUSCITATION</b>                            |                                                                                                                                                 |                                                                         |        |        |            |                |
| 1                                               | Recognizes unstable vital signs in pregnant patient                                                                                             | 5                                                                       | 3      | 0      | N/A        | 1 min          |
| 2                                               | Recognizes cardiac arrest*                                                                                                                      | 5                                                                       | 3      | 0      | N/A        |                |
| 3                                               | Activates MCAT                                                                                                                                  | 5                                                                       | 3      | 0      | N/A        |                |
| 4                                               | Positions patient flat and places backboard                                                                                                     | 5                                                                       | 3      | 0      | N/A        |                |
| 5                                               | Initiates high-quality chest compressions*                                                                                                      | 5                                                                       | 3      | 0      | N/A        |                |
| 6                                               | Establishes and maintains effective ventilation*                                                                                                | 5                                                                       | 3      | 0      | N/A        |                |
| 7                                               | Ventilates at appropriate rate                                                                                                                  | 5                                                                       | 3      | 0      | N/A        |                |
| 8                                               | Assesses possibility of pregnancy/assesses uterine fundus relationship to umbilicus                                                             | 5                                                                       | 3      | 0      | N/A        |                |
| 9                                               | Performs and maintains LUD throughout resuscitation*                                                                                            | 5                                                                       | 3      | 0      | N/A        |                |
| 10                                              | Gathers equipment for RCD                                                                                                                       | 5                                                                       | 3      | 0      | N/A        | 2-5 mins       |
| 11                                              | Places defibrillation pads avoiding breast tissue                                                                                               | 5                                                                       | 3      | 0      | N/A        |                |
| 12                                              | Assesses cardiac rhythm immediately after placing pads*                                                                                         | 5                                                                       | 3      | 0      | N/A        |                |
| 13                                              | Removes fetal monitors                                                                                                                          | 5                                                                       | 3      | 0      | N/A        |                |
| 14                                              | Defibrillates if indicated, clears patient before shock*                                                                                        | 5                                                                       | 3      | 0      | N/A        |                |
| 15                                              | Inserts IV or IO above diaphragm                                                                                                                | 5                                                                       | 3      | 0      | N/A        |                |
| 16                                              | Administers epinephrine:<br>a. non-shockable: immediately<br>b. shockable: after two shocks                                                     | 5<br>5                                                                  | 3<br>3 | 0<br>0 | N/A<br>N/A |                |
| 17                                              | Assesses cardiac rhythm and performs pulse check every 2 minutes*                                                                               | 5                                                                       | 3      | 0      | N/A        |                |
| 18                                              | Recognizes and treats reversible etiologies for MCA, if applicable (e.g., calcium gluconate for magnesium toxicity, Narcan for opioid overdose) | 5                                                                       | 3      | 0      | N/A        |                |
| 19                                              | Completes RCD by 5 min at site of arrest*                                                                                                       | 5                                                                       | 3      | 0      | N/A        |                |
| 20                                              | Maintains chest compression effectiveness throughout, minimizes chest compression interruptions (< 10 sec delay)                                | 5                                                                       | 3      | 0      | N/A        | 5+ mins        |
| 21                                              | Timely notification of contingency teams (i.e., ECPR, MAST, vascular surgeon)                                                                   | 5                                                                       | 3      | 0      | N/A        |                |
| 22                                              | Verifies ROSC                                                                                                                                   | 5                                                                       | 3      | 0      | N/A        |                |
| <b>A. Resuscitation SUBTOTAL (Items 1-21)</b>   |                                                                                                                                                 |                                                                         |        |        |            |                |
| <b>POST-ROSC CARE</b>                           |                                                                                                                                                 |                                                                         |        |        |            |                |
| 23                                              | Discusses post-arrest care elements following ROSC to establish next steps in management                                                        | 5                                                                       | 3      | 0      | N/A        | POST-ROSC CARE |
| 24                                              | Secures airway and gives breaths every 6 seconds, as needed                                                                                     | 5                                                                       | 3      | 0      | N/A        |                |
| 25                                              | Maintains LUD, if pregnant                                                                                                                      | 5                                                                       | 3      | 0      | N/A        |                |
| 26                                              | Maintains vascular access and administers fluids                                                                                                | 5                                                                       | 3      | 0      | N/A        |                |
| 27                                              | Uses BAACC TO LIFE to consider potential etiology(ies)                                                                                          | 5                                                                       | 3      | 0      | N/A        |                |
| 28                                              | Manages wounds (closure, antibiotics)                                                                                                           | 5                                                                       | 3      | 0      | N/A        |                |
| 29                                              | Orders head CT prior to transfer to ICU, if indicated                                                                                           | 5                                                                       | 3      | 0      | N/A        |                |
| <b>B. Post-ROSC Care SUBTOTAL (Items 22-28)</b> |                                                                                                                                                 |                                                                         |        |        |            |                |

| TEAM LEADER PERFORMANCE                                  |                                                                                                  |                                                                         |   |   |     |
|----------------------------------------------------------|--------------------------------------------------------------------------------------------------|-------------------------------------------------------------------------|---|---|-----|
| Step                                                     | Assessment/Action                                                                                | Done Correctly = 5<br>Done Poorly or Delayed = 3<br>Not Done = 0<br>N/A |   |   |     |
| 30                                                       | Effectively guides resuscitation, focusing on high-quality chest compressions and continuous LUD | 5                                                                       | 3 | 0 | N/A |
| 31                                                       | Effectively delineates responsibilities to team members                                          | 5                                                                       | 3 | 0 | N/A |
| 32                                                       | Ensures team member keeps time of cardiac arrest and logs times/interventions                    | 5                                                                       | 3 | 0 | N/A |
| 33                                                       | Ensures contingency teams are present and working together effectively                           | 5                                                                       | 3 | 0 | N/A |
| 34                                                       | Recommends debrief w/ OBLS debrief tool                                                          | 5                                                                       | 3 | 0 | N/A |
| <b>C. Team Leader Performance SUBTOTAL (Items 29-33)</b> |                                                                                                  |                                                                         |   |   |     |

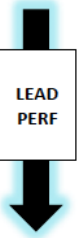

| COMMUNICATION/TEAMWORK                                  |                                                    |                                                                        |   |   |   |   |
|---------------------------------------------------------|----------------------------------------------------|------------------------------------------------------------------------|---|---|---|---|
| Step                                                    | How well <u>did the TEAM</u>                       | Perfect = 5    Good = 4<br>Average = 3    Poor = 2<br>Unacceptable = 1 |   |   |   |   |
| 35                                                      | Use SBAR to orient team members as they arrived?   | 5                                                                      | 4 | 3 | 2 | 1 |
| 36                                                      | Call for ADDITIONAL ASSISTANCE in a timely manner? | 5                                                                      | 4 | 3 | 2 | 1 |
| 37                                                      | Utilize CLOSED-LOOP communication?                 | 5                                                                      | 4 | 3 | 2 | 1 |
| 38                                                      | Maintain SITUATIONAL AWARENESS?                    | 5                                                                      | 4 | 3 | 2 | 1 |
| 39                                                      | Utilize PATIENT FRIENDLY language and tone         | 5                                                                      | 4 | 3 | 2 | 1 |
|                                                         | <b>Rate</b>                                        |                                                                        |   |   |   |   |
| 40                                                      | OVERALL team communication                         | 5                                                                      | 4 | 3 | 2 | 1 |
| 41                                                      | OVERALL team performance                           | 5                                                                      | 4 | 3 | 2 | 1 |
| <b>D. Communication/Teamwork SUBTOTAL (Items 34-40)</b> |                                                    |                                                                        |   |   |   |   |

| SCORING |                                                 |            |
|---------|-------------------------------------------------|------------|
|         |                                                 | Subtotals  |
| A       | Resuscitation                                   |            |
| B       | Post-ROSC                                       |            |
| C       | Team Performance                                |            |
| D       | Total Communication/Teamwork                    |            |
| E       | Subtotal (add A + B + C + D)                    |            |
| F       | <b>Total points possible</b>                    | <b>210</b> |
| G       | N/A adjustment (# of N/A _____ multiplied by 5) |            |
| H       | Adjusted total points (F minus G)               |            |
| I       | Overall weighted score (divide E by H)          |            |
| J       | Number of critical components* scored 0 (#1-22) |            |

**SUMMARY**

PASS = Overall score > 74% and no critical components scored 0.  
Circle YES or NO.

|     |    |
|-----|----|
| YES | NO |
|-----|----|

Instructor Signature: \_\_\_\_\_

Instructor Name and Date: \_\_\_\_\_

|                       |     |    |
|-----------------------|-----|----|
| Instructor potential? | YES | NO |
|-----------------------|-----|----|

eFigure 4. Orientation checklist for In-Person Training.

**RCT IH MORNING**  
**Pre-RCDP Orientation Checklist**

**Checklist Purpose:** To guide instructors as they introduce the OBLS in-person course.

**Timing:** In the morning, before starting the rapid-cycle deliberate practice training scenarios.

|                          |                                                                                                                                                                                                                                                                                                                                                                                                                                                                                                                                                                                                                                                                                                                                                                                                                                                                                                                         |
|--------------------------|-------------------------------------------------------------------------------------------------------------------------------------------------------------------------------------------------------------------------------------------------------------------------------------------------------------------------------------------------------------------------------------------------------------------------------------------------------------------------------------------------------------------------------------------------------------------------------------------------------------------------------------------------------------------------------------------------------------------------------------------------------------------------------------------------------------------------------------------------------------------------------------------------------------------------|
| <input type="checkbox"/> | <b>Introduce yourself</b>                                                                                                                                                                                                                                                                                                                                                                                                                                                                                                                                                                                                                                                                                                                                                                                                                                                                                               |
| <input type="checkbox"/> | <b>Invite participants to introduce themselves and current profession</b>                                                                                                                                                                                                                                                                                                                                                                                                                                                                                                                                                                                                                                                                                                                                                                                                                                               |
| <input type="checkbox"/> | <b>Emphasize that the simulated environment allows for mistakes</b>                                                                                                                                                                                                                                                                                                                                                                                                                                                                                                                                                                                                                                                                                                                                                                                                                                                     |
| <input type="checkbox"/> | <p><b>Set the stage</b></p> <ul style="list-style-type: none"> <li>• Remind participants that everyone is capable, smart, and desires to learn.</li> <li>• State that you will interrupt them and give specific feedback about what you see.</li> <li>• Normalize mistakes and let them know that they'll repeat tasks.             <ul style="list-style-type: none"> <li>○ "You will make mistakes. If you were teaching and I were the student, I would be making mistakes."</li> </ul> </li> </ul> <p><b>Ask participants to</b></p> <ul style="list-style-type: none"> <li>• treat the scenario as real as possible</li> <li>• take care of patients within their current scope of practice (i.e., RN does not do RCD)</li> <li>• participate as fully as possible</li> <li>• remain focused on the training</li> </ul>                                                                                            |
| <input type="checkbox"/> | <p><b>Introduce rapid-cycle deliberate practice</b></p> <ul style="list-style-type: none"> <li>• Real-time corrections to create new skills through repetition and practice</li> <li>• Maximizes learning by reinforcing learning in real-time, while emphasizing teamwork</li> <li>• "I'll be calling timeouts to provide immediate feedback and correct the mistake. Then, we'll rewind 30 seconds to repeat the scenario so you can practice the appropriate action."</li> <li>• Request participants to ask questions and call time outs when something isn't clear</li> </ul>                                                                                                                                                                                                                                                                                                                                      |
| <input type="checkbox"/> | <p><b>Introduce the manikin's features and technology, as applicable</b></p> <ul style="list-style-type: none"> <li>• Recognize the limitations of manikin             <ul style="list-style-type: none"> <li>○ "Skin doesn't change color or feel or look real, and she has no extremities"</li> </ul> </li> <li>• Demonstrate left uterine displacement (LUD) from manikin's left and show indicator color change             <ul style="list-style-type: none"> <li>○ Invite participants to briefly practice LUD</li> </ul> </li> <li>• Note chest compressions monitor on iPad</li> <li>• Demonstrate resuscitative cesarean delivery and how to place backboard</li> <li>• Indicate defibrillator pad placement avoiding breast tissue</li> <li>• Note intubatable airway, demonstrate head-tilt/chin lift, jaw thrust, capnography</li> <li>• Demonstrate rotation of compressor and LUD participants</li> </ul> |
| <input type="checkbox"/> | <b>Instruct participants to do everything at/to the manikin (e.g., ask questions, physical exam, procedures)</b>                                                                                                                                                                                                                                                                                                                                                                                                                                                                                                                                                                                                                                                                                                                                                                                                        |
| <input type="checkbox"/> | <p><b>Orient participants to</b></p> <ul style="list-style-type: none"> <li>• resuscitative cesarean delivery kit</li> <li>• hemorrhage cart</li> <li>• simulated blood products</li> <li>• crash cart with simulated medications</li> </ul>                                                                                                                                                                                                                                                                                                                                                                                                                                                                                                                                                                                                                                                                            |

6/6/2023



**RCT IH MORNING**  
**Pre-RCDP Orientation Checklist**

|                          |                                                                                                                                                                                                                                                                                                                                                                                                                                                                                                                                                                                                                                                                                                                                                                                                                                                                                                                                                                            |
|--------------------------|----------------------------------------------------------------------------------------------------------------------------------------------------------------------------------------------------------------------------------------------------------------------------------------------------------------------------------------------------------------------------------------------------------------------------------------------------------------------------------------------------------------------------------------------------------------------------------------------------------------------------------------------------------------------------------------------------------------------------------------------------------------------------------------------------------------------------------------------------------------------------------------------------------------------------------------------------------------------------|
|                          | <ul style="list-style-type: none"> <li>○ participants should locate meds and place beside manikin; do not need to draw them up</li> <li>● airway equipment</li> <li>● defibrillator and pads             <ul style="list-style-type: none"> <li>○ participants should place pads on manikin and turn on and charge machine; instructors will show rhythm strips</li> </ul> </li> </ul>                                                                                                                                                                                                                                                                                                                                                                                                                                                                                                                                                                                     |
| <input type="checkbox"/> | <p><b>Introduce participant roles</b></p> <ul style="list-style-type: none"> <li>● 6 participants             <ol style="list-style-type: none"> <li>1. Team lead</li> <li>2. Compressor</li> <li>3. LUD</li> <li>4. Crash cart</li> <li>5. Airway</li> <li>6. Recorder*</li> </ol> </li> </ul> <p>*if &lt;6 participants, combine crash cart and recorder</p> <ul style="list-style-type: none"> <li>● Participants activate MCAT, provide SBAR, and assist team leader</li> </ul>                                                                                                                                                                                                                                                                                                                                                                                                                                                                                        |
| <input type="checkbox"/> | <p><b>Introduce instructor roles</b></p> <ul style="list-style-type: none"> <li>● will pause training scenarios to provide rapid cycle deliberate practice</li> <li>● will end the scenario and guide participants</li> <li>● during megacode             <ul style="list-style-type: none"> <li>○ One instructor leads the simulation, acts as the patient, ensures proper case flow, and both grade the team leader with the megacode checklist</li> </ul> </li> </ul>                                                                                                                                                                                                                                                                                                                                                                                                                                                                                                   |
| <input type="checkbox"/> | <p><b>Introduce scenario flow</b></p> <ul style="list-style-type: none"> <li>● Three training scenarios with timeouts to correct action             <ul style="list-style-type: none"> <li>○ Prearrest</li> <li>○ arrest</li> <li>○ post-ROSC using post-ROSC checklist</li> <li>○ debrief using megacode checklist</li> <li>○ sharing difficult news</li> </ul> </li> <li>● Each training scenario will be different and each megacode different from the training scenarios</li> <li>● Each participant will be a team lead in the morning and afternoon</li> <li>● If 6 participants, each morning scenario will have 2 team leads who switch in scenario middle</li> <li>● Instructors will             <ul style="list-style-type: none"> <li>○ give 1<sup>st</sup> participant HPI/initial scenario</li> <li>○ stop and correct mistakes</li> </ul> </li> <li>● Scenarios will progress into arrest and end in ROSC once the team completes various steps</li> </ul> |

7/5/2024

6/6/2023
