# Supplementary material for: Obstetric Life Support Education for Maternal Cardiac Arrest: A Randomized Clinical Trial
Source: PubMed Central journal article supplement (PMC11568455; doi:10.1001/jamanetworkopen.2024.45295), 2024-11-15
Supplement: jamanetwopen-e2445295-s003.pdf [file jamanetwopen-e2445295-s003.pdf]

# Data Sharing Statement

Shields. Obstetric Life Support Education for Maternal Cardiac Arrest. *JAMA Netw Open*.  
Published November 15, 2024. doi:10.1001/jamanetworkopen.2024.45295

## Data

**Additional Information:** Clinicaltrials.gov, <https://clinicaltrials.gov/study/NCT05355519>,  
NCT05355519

**Data available:** Yes

**Data types:** Deidentified participant data

**How to access data:** The steering committee will evaluate all requests. Requests should be sent to [ashiels@uchc.edu](mailto:ashiels@uchc.edu)

**When available:** With publication

## Supporting Documents

**Document types:** Statistical/analytic code, Informed consent form

**How to access documents:** R custom script. The steering committee will evaluate all requests. Requests should be sent to [ashiels@uchc.edu](mailto:ashiels@uchc.edu)

**When available:** With publication

## Additional Information

**Who can access the data:** researchers whose proposed use of the data has been approved

**Types of analyses:** for a specified purpose

**Mechanisms of data availability:** without investigator support, after approval of a proposal, or with a signed data access agreement).

**Any additional restrictions:** N/A
